# Supplementary material for: Energy self-sufficient households with photovoltaics and electric vehicles are feasible in temperate climate
Source: PLoS One. 2020 Mar 4;15(3):e0227368. doi: 10.1371/journal.pone.0227368 (PMC7055740; doi:10.1371/journal.pone.0227368)
Supplement: S3 Dataset — File name S3_Methods_Scenarios_BackupStorage175. (XLSX) [file pone.0227368.s003.xlsx]

## Sheet: DHW real
	adjusted to SPF of heat pump					8	11		Final Table					Conventional building
	factor	3.5				11.8	23			SFH	MFH unit			SFB	MFB
						23.8			January	51.9048	270		january	181.667	945
						15.2			February	51.9048	270		february	181.667	945
					average [kWh/(m2*year)]	14.7	17		March	51.9048	270		march	181.667	945
									April	51.9048	270		april	181.667	945
						10.878	12.58		May	51.9048	270		may	181.667	945
									June	51.9048	270		june	181.667	945
									July	51.9048	270		july	181.667	945
									August	51.9048	270		august	181.667	945
						SFB	MFB		September	51.9048	270		september	181.667	945
						10.9	12.6		October	51.9048	270		october	181.667	945
						200	900		November	51.9048	270		november	181.667	945
						2180	11340		December	51.9048	270		december	181.667	945
						181.667	945		Total	622.857	3240		sum	2180	11340

## Sheet: space heat
	16	22.5					heat pump SPF		heat pump SPF of retrofitted houses				factor:	100
	0.53	0.56					4.818		4.38438
	7.52	9.9
				1504	1980
	18.2	20.9
	0.34	0.39
	12.012	12.749
				10810.8	11474.1
	Final Table									withouth SPF (for conventional heating)
		%heating		new SFH	retro SFH	new MFH	retro MFH			new SFH	retro SFH	new MFH	retro MFH
	January	19.8	0.198	61.8082	89.4174	444.279	518.174		January	297.792	392.04	2140.54	2271.87
	February	16.5	0.165	51.5068	74.5145	370.233	431.812		February	248.16	326.7	1783.78	1893.23
	March	14.2	0.142	44.3271	64.1277	318.625	371.62		March	213.568	281.16	1535.13	1629.32
	April	3.2	0.032	9.98921	14.4513	71.8027	83.7453		April	48.128	63.36	345.946	367.171
	May	0	0	0	0	0	0		May	0	0	0	0
	June	0	0	0	0	0	0		June	0	0	0	0
	July	0	0	0	0	0	0		July	0	0	0	0
	August	0	0	0	0	0	0		August	0	0	0	0
	September	1.5	0.015	4.68244	6.77405	33.6575	39.2556		September	22.56	29.7	162.162	172.111
	October	9	0.09	28.0946	40.6443	201.945	235.534		October	135.36	178.2	972.972	1032.67
	November	13.8	0.138	43.0785	62.3212	309.649	361.152		November	207.552	273.24	1491.89	1583.43
	December	21.9	0.219	68.3636	98.9011	491.4	573.132		December	329.376	433.62	2367.57	2512.83
				311.851	451.152	2241.59	2614.42			1502.5	1978.02	10800	11462.6

## Sheet: Spatial dimension
		days		365		occupancy rate	1.6	people/car		km/(person*year) without occupancy rate
		months		12		SFH	4			pp	Urban			Rural
		kWh/100km		12		MFH	20				SFH	MFH		SFH	MFH
	urban										21.0978	18.4126		33.1123	28.2269
		km/person/day		20.1						km/year	7700.7	6720.61		12086	10302.8
		Declinition		0.0171533						km/(person*car*year) with occupancy rate
		km/person/day with declination		19.7552						pp	Urban			Rural
		SFH average km		27.5							SFH	MFH		SFH	MFH
		MFH average km		24
		difference		3.5						km/year with occupancy rate	4812.94	4200.38		7553.75	6439.26
		half of difference		1.75						km/(house unit*year)
		distribution of difference		25.75						p unit	Urban			Rural
		ratio of SFH and MFH		0.0679612							SFH	MFH		SFH	MFH
	rural									km/year with occupancy rate	19251.7	84007.6		30215	128785
		km/person/day		31.2						kWh/km	0.12
		Declinition		0.017						kWh/(house unit * year)
		km/person/day with declination		30.6696						p unit	Urban			Rural
		SFH average km		30.5							SFH	MFH		SFH	MFH
		MFH average km		26
		difference		4.5						km/year with occupancy rate	2310.21	10080.9		3625.8	15454.2
		half of difference		2.25						Final Table
		distribution of difference		28.25						kWh/(house unit * month)
		ratio of SFH and MFH		0.079646						p unit	Urban			Rural
											SFH	MFH		SFH	MFH
	People in Mio.	7.87	8.758	9.541	10.044	0.276	-0.146837			km/year with occupancy rate	192.517	840.076		302.15	1287.85
		115187	127470	137820	144510	0.255	-0.133679
	14636	14555	14445	14388		14305.3
		81	110	57	82.6667		0.0171533
					0.0114737

## Sheet: Electricity demand
		Final Table								factor:	100
			Progressive electricity demand - SFH	Progressive electricity demand - MFH	Conservative electricity demand - SFH	Conservative electricity demand - MFH					progressive		conservative			sum (for control)
		January	326.175	1207.47	427.297	1581.82					SFH	MFH	SFH	MFH		3806.09	14089.8	4945.77	18308.9
		February	315.401	1167.59	413.183	1529.57			Electricity demand.		5200	19250	5200	19250
		March	310.503	1149.46	406.768	1505.82			reduction		0.29306	0.29306	0.07389	0.07389
		April	300.219	1111.39	393.295	1455.95			reduced demand		3676.09	13608.6	4815.77	17827.6
		May	294.342	1089.63	385.596	1427.45			13.3% of red. Demand		490.709	1816.57	642.842	2379.75
		June	312.996	1158.69	401.973	1488.07			base red. Demand w/o 13.3%		3185.38	11792	4172.93	15447.9
		July	350.527	1297.62	439.048	1625.32			monthly base red. Demand w/o 13.3%		265.448	982.669	347.744	1287.32
		August	324.037	1199.56	412.407	1526.7			climate share		0.025	0.025	0.025	0.025
		September	298.75	1105.95	391.37	1448.82			climate share [kWh]		130	481.25	130	481.25
		October	316.87	1173.03	415.108	1536.7			climate share June		26	96.25	26	96.25
		November	326.175	1207.47	427.297	1581.82			climate share August		39	144.375	39	144.375
		December	330.093	1221.98	432.43	1600.82			climate share July		65	240.625	65	240.625
		Total	3806.09	14089.8	4945.77	18308.9
										January	February	March	April	May	June	July	August	September	October	November	December
									%lighting	12.4	10.2	9.2	7.1	5.9	4.4	4.1	4	6.8	10.5	12.4	13.2	100.2
									lighting in absolute values	0.124	0.102	0.092	0.071	0.059	0.044	0.041	0.04	0.068	0.105	0.124	0.132	1.002
									transposed	%lighting	lighting in absolute values	adjusted absolute values to 100.00%
									January	12.4	0.124	0.123752
									February	10.2	0.102	0.101796
									March	9.2	0.092	0.0918164
									April	7.1	0.071	0.0708583
									May	5.9	0.059	0.0588822
									June	4.4	0.044	0.0439122
									July	4.1	0.041	0.0409182
									August	4	0.04	0.0399202
									September	6.8	0.068	0.0678643
									October	10.5	0.105	0.10479
									November	12.4	0.124	0.123752
									December	13.2	0.132	0.131737
										100.2	1.002	1

## Sheet: rooftopfacade area
								Assumption:
		rooftop						SFB -> only two stories and not three -> rooftop area increases!
		MFB			SFH
		floor area	900		200
		stories	5		3
		per story	180		66.6667
		each house side	13.4164		8.16497
		rooftop angle	35		35
		tan(35)	0.700208		0.700208
		roof height (ankatete)	9.39427		5.71717
		roof hypothenuse	16.3784		9.96758
		roof area	219.739		81.385
		Facade
		L	14.5		8.5
		H	14		9
		area	203		76.5
		share of PV	0.333333		0.333333
		PV area	67.6667		25.5

## Sheet: PV efficiency
		rooftop to facade efficiency factor:					mono cr-Si	0.267
							thin film	0.21
							factor	0.786517
		Same efficiency as today				Efficiency: 0.05%/year				Efficiency: 0.10%/year				Efficiency: 0.15%/year
			mono cr-Si	thin film			mono cr-Si	thin film			mono cr-Si	thin film			mono cr-Si	thin film
		2050	0.17	0.133708		2050	0.187	0.147079		2050	0.204	0.160449		2050	0.221	0.17382
		Efficiency: 0.20%/year				Efficiency: 0.25%/year				Efficiency: 0.25%/year				Efficiency: 0.17%/year
			mono cr-Si	thin film			mono cr-Si	thin film			mono cr-Si	thin film			mono cr-Si	thin film
			0.238	0.187191			0.255	0.200562			0.272	0.213933		2050	0.2278	0.179169

## Sheet: Storage eff.
	Efficiencies
	compression effort	1
	electrolyzer	0.8
	fuel cell	0.52
	battery factor	0.92
	round trip	0.38272
	Storage tank factor
		0.736

## Sheet: Electricity prod.
										Efficiency matters
		Final Table								efficiency in 2050 rooftop	0.272
			SFH new	MFH new	SFH retrofitted	MFH retrofitted				efficiency in 2050 facade	0.213933
		January	366.86	990.522	366.86	990.522				performance ratio	0.9
		February	537.972	1452.53	537.972	1452.53				battery efficiency	0.92
		March	884.361	2387.78	884.361	2387.78				Inverter efficiency	0.99
		April	1088.91	2940.07	1088.91	2940.07				kwh/m2/year rooftop	1000
		May	1292.19	3488.9	1292.19	3488.9				kwh/m2/year facade	800
		June	1341.49	3622.04	1341.49	3622.04				efficiency future rooftop	222.964
		July	1427.97	3855.53	1427.97	3855.53				efficiency future facade	140.292
		August	1265.23	3416.11	1265.23	3416.11
		September	933.876	2521.47	933.876	2521.47					SFH new	MFH new	SFH retro	MFH retro
		October	621.857	1679.02	621.857	1679.02				rooftop
		November	368.885	995.991	368.885	995.991				yearly prod/m2	222.964	222.964
		December	285.037	769.6	285.037	769.6				factor of rooftop discount	0	0	0.3	0.3
		Total	10414.6	28119.5	10414.6	28119.5				rooftop area of solar PV w/o discount	81.385	219.739	81.385	219.739
										rooftop area of solar PV w discount	46.71	126.117	46.71	126.117	56.9695	153.818
										rooftop area of solar collectors	0	0	0	0
										rooftop area w/o solar collectors	46.71	126.117	46.71	126.117
										yearly yield	10414.6	28119.5	10414.6	28119.5
										facade
										yearly prod/m2	140.292	140.292
										facade area	0	0
										yearly yield	0	0
										total yield	10414.6	28119.5
										Share rooftop	Share facades
										0.0352254	0.0490325
										0.0516554	0.065055
										0.0849151	0.09005
										0.104556	0.0981183
										0.124074	0.110197
										0.128808	0.113305
										0.137112	0.121752
										0.121485	0.113136
										0.0896695	0.09076
										0.0597099	0.0669105
										0.0354199	0.0441895
										0.0273689	0.0374937
										1	1

## Sheet: 75%LCOE sheet 
			LCOE																		Total costs																			facade area
			SFH									MFH unit									SFH									MFH unit										SFH									MFH unit
			New				Retrofit					New				Retrofit					New				Retrofit					New				Retrofit						New				Retrofit					New
			Progressive		Conservative		Progressive		Conservative			Progressive		Conservative		Progressive		Conservative			Progressive		Conservative		Progressive		Conservative			Progressive		Conservative		Progressive		Conservative				Progressive		Conservative		Progressive		Conservative			Progressive
			Urban	Rural	Urban	Rural	Urban	Rural	Urban	Rural		Urban	Rural	Urban	Rural	Urban	Rural	Urban	Rural		Urban	Rural	Urban	Rural	Urban	Rural	Urban	Rural		Urban	Rural	Urban	Rural	Urban	Rural	Urban	Rural			Urban	Rural	Urban	Rural	Urban	Rural	Urban	Rural		Urban
0.221
standard			0.976282	0.875514	0.883768	0.807547	0.958758	0.880617	0.886939	0.826073		0.693459	0.651982	0.658119	0.62507	0.713783	0.669224	0.675866	0.640414		138182	146265	145256	153340	139401	148337	147238	156174		415969	452469	444983	481483	424541	461041	453555	490055			0	0	0	0	0.13007	0.713573	0.651805	1.23531		0.561405
PV costs of 300 /m2			1.0169	0.916132	0.924385	0.848164	1.00022	0.92524	0.931269	0.872868		0.736425	0.697876	0.703521	0.672812	0.763096	0.720619	0.726911	0.693121		143931	153051	151932	161052	145429	155854	154597	165021		441742	484319	475681	518258	453871	496448	487810	530387			0	0	0	0	0.13007	0.713573	0.651805	1.23531		0.561405
same electrolyzer price like today			1.10732	0.986533	0.996611	0.905222	1.08632	0.990723	0.998663	0.924175		0.744523	0.69612	0.703422	0.664835	0.765283	0.713686	0.72151	0.680443		156729	164812	163803	171887	157947	166884	165785	174721		446600	483100	475614	512113	455172	491672	484185	520685			0	0	0	0	0.13007	0.713573	0.651805	1.23531		0.561405
same fuel cell price like today			1.1439	1.01752	1.02811	0.932485	1.12192	1.02146	1.02985	0.951558		0.763426	0.712458	0.720191	0.679555	0.784346	0.730144	0.738406	0.69526		161905	169989	168980	177064	163124	172061	170962	179898		457939	494439	486952	523452	466510	503010	495524	532024			0	0	0	0	0.13007	0.713573	0.651805	1.23531		0.561405
same battery price like today			1.13088	1.03093	1.03842	0.962913	1.11223	1.03733	1.04266	0.984405		0.846868	0.808609	0.813582	0.783181	0.870445	0.828683	0.834227	0.801085		160063	172230	170675	182841	161715	174734	173089	186108		507991	561167	550098	603273	517720	570896	559827	613002			0	0	0	0	0.13007	0.713573	0.651805	1.23531		0.561405
storage tank 880			1.00132	0.900687	0.908816	0.832711	0.983615	0.905998	0.912161	0.851717		0.718306	0.67735	0.683299	0.650678	0.739157	0.69505	0.701514	0.666437		141726	150471	149373	158118	143015	152612	151425	161023		430873	470074	462008	501208	439633	478834	470767	509968			0	0	0	0	0.13007	0.713573	0.651805	1.23531		0.561405
same battery price, electrolyzer, tank and fuel cell			1.45457	1.30913	1.32065	1.21069	1.42781	1.31365	1.32252	1.23364		0.992746	0.938589	0.946135	0.90304	1.01788	0.959892	0.968061	0.921983		205878	218706	217063	229890	207599	221280	219547	233227		595496	651372	639723	695599	605412	661288	649639	705515			0	0	0	0	0.13007	0.713573	0.651805	1.23531		0.561405
discount rate 0%			0.76654	0.68991	0.696075	0.638126	0.752871	0.693345	0.698051	0.651697		0.539054	0.509047	0.513355	0.489462	0.553916	0.521657	0.526333	0.500684		159665	169617	168365	178317	161093	171875	170535	181317		475853	519890	510807	554844	484839	528876	519792	563829			0	0	0	0	0.13007	0.713573	0.651805	1.23531		0.561405
discount rate 6%			1.09878	0.984048	0.993505	0.906712	1.07902	0.990121	0.997371	0.92812		0.783784	0.735706	0.742891	0.704573	0.807285	0.755642	0.763411	0.722314		131255	138747	137815	145307	132408	140761	139737	148090		396796	430912	423930	458045	405239	439354	432373	466488			0	0	0	0	0.13007	0.713573	0.651805	1.23531		0.561405
heat pump 33% cheaper			0.889804	0.802248	0.809298	0.743086	0.874575	0.807953	0.813207	0.76133		0.615919	0.584961	0.589329	0.564687	0.635582	0.601709	0.606556	0.579631		125942	134025	133016	141100	127160	136097	134998	143934		369457	405957	398471	434971	378029	414529	407043	443543
			0.96105	not valid	not valid	not valid	not valid	not valid	not valid	not valid		not valid	not valid	not valid	not valid	not valid	not valid	not valid	not valid		136026	not valid	not valid	not valid	not valid	not valid	not valid	not valid		not valid	not valid	not valid	not valid	not valid	not valid	not valid	not valid			0	not valid	not valid	not valid	not valid	not valid	not valid	not valid		not valid
0.272
standard			0.961051	0.860283	0.868537	0.792315	0.938601	0.843767	0.85154	0.790816		0.66741	0.619158	0.624963	0.593502	0.681647	0.6387	0.645093	0.610828		136026	143721	142753	150448	136987	144682	143714	151990		404559	437181	430126	464347	411201	445422	438368	472589			0	0	0	0	0	0	0	0.402464		0
PV costs of 300 /m2			0.994052	0.893285	0.901538	0.825317	0.971603	0.876768	0.884542	0.825798		0.700411	0.653268	0.658598	0.6294	0.719071	0.678151	0.684203	0.651562		140697	149234	148177	156714	141804	150341	149284	158713		424563	461266	453275	492434	433777	472935	464945	504103			0	0	0	0	0	0	0	0.402464		0
same electrolyzer price like today			1.09209	0.971301	0.98138	0.889991	1.06616	0.953873	0.963264	0.888919		0.718474	0.663295	0.670266	0.633267	0.733147	0.683162	0.690737	0.650857		154573	162267	161300	168995	155534	163229	162261	170537		435189	467812	460757	494978	441832	476053	468998	503219			0	0	0	0	0	0	0	0.402464		0
same fuel cell price like today			1.12866	1.00229	1.01288	0.917254	1.10177	0.984605	0.994449	0.916301		0.737377	0.679633	0.687035	0.647987	0.752211	0.69962	0.707634	0.665675		159750	167444	166477	174171	160711	168406	167438	175713		446528	479150	472096	506317	453170	487391	480337	514558			0	0	0	0	0	0	0	0.402464		0
same battery price like today			1.11565	1.0157	1.02319	0.947681	1.09207	1.00047	1.00726	0.949148		0.820819	0.775784	0.780426	0.751613	0.83831	0.798159	0.803455	0.771499		157908	169685	168172	179949	159301	171079	169565	181923		496581	545878	535242	586138	504380	555277	544640	595536			0	0	0	0	0	0	0	0.402464		0
storage tank 880			0.98609	0.885455	0.893585	0.817479	0.963459	0.869148	0.876762	0.81646		0.692257	0.644526	0.650143	0.61911	0.707021	0.664526	0.670742	0.636851		139570	147926	146870	155226	140601	148958	147901	156838		419463	454786	447151	484073	426293	463215	455580	492502			0	0	0	0	0	0	0	0.402464		0
same battery price, electrolyzer and fuel cell			1.43934	1.2939	1.30542	1.19546	1.40588	1.26916	1.27999	1.19173		0.963578	0.900853	0.907916	0.867173	0.981477	0.925838	0.933647	0.889315		203722	216161	214559	226998	205186	217625	216023	229042		584085	636083	624866	678464	592072	645669	634452	688049			0	0	0	0	0	0	0	0.402464		0
discount rate 0%			0.75619	0.67956	0.685725	0.627776	0.738816	0.666742	0.672541	0.62637		0.520714	0.485721	0.489775	0.467109	0.531202	0.500181	0.504666	0.479933		157509	167073	165862	175425	158685	168248	167037	177161		464502	504716	496065	537823	471579	513336	504685	546443			0	0	0	0	0	0	0	0.402464		0
discount rate 6%			1.08073	0.966	0.975458	0.888665	1.05533	0.947333	0.956244	0.887112		0.753275	0.697381	0.704189	0.667669	0.769697	0.719883	0.727369	0.687618		129099	136203	135312	142415	129993	137096	136205	143896		385366	415585	409036	440872	391872	423709	417159	448996			0	0	0	0	0	0	0	0.402464		0
heat pump 20% cheaper			0.874572	0.787017	0.794066	0.727855	0.854418	0.771103	0.777809	0.726074		0.58987	0.552137	0.556173	0.533119	0.603447	0.571185	0.575783	0.550045		123786	131481	130513	138208	124747	132442	131474	139750		358047	390669	383614	417835	364689	398910	391856	426077
			0.96105	not valid	not valid	not valid	not valid	not valid	not valid	not valid		not valid	not valid	not valid	not valid	not valid	not valid	not valid	not valid		136026	not valid	not valid	not valid	not valid	not valid	not valid	not valid		not valid	not valid	not valid	not valid	not valid	not valid	not valid	not valid			0	not valid	not valid	not valid	not valid	not valid	not valid	not valid		not valid
[truncated: 23 more columns]

## Sheet: Cases
		Case X
		SFH									MFH unit
		New				Retrofit					New				Retrofit
		Progressive		Conservative		Progressive		Conservative			Progressive		Conservative		Progressive		Conservative
		Urban	Rural	Urban	Rural	Urban	Rural	Urban	Rural		Urban	Rural	Urban	Rural	Urban	Rural	Urban	Rural
	solar yield	10414.6	10414.6	10414.6	10414.6	10414.6	10414.6	10414.6	10414.6		28119.5	28119.5	28119.5	28119.5	28119.5	28119.5	28119.5	28119.5
	DHW expense	622.857	622.857	622.857	622.857	622.857	622.857	622.857	622.857		3240	3240	3240	3240	3240	3240	3240	3240
	Heat expense	311.851	311.851	311.851	311.851	451.152	451.152	451.152	451.152		2241.59	2241.59	2241.59	2241.59	2614.42	2614.42	2614.42	2614.42
	Electricity demand	3806.09	3806.09	4945.77	4945.77	3806.09	3806.09	4945.77	4945.77		14089.8	14089.8	18308.9	18308.9	14089.8	14089.8	18308.9	18308.9
	Spatial expense	2310.21	3625.8	2310.21	3625.8	2310.21	3625.8	2310.21	3625.8		10080.9	15454.2	10080.9	15454.2	10080.9	15454.2	10080.9	15454.2
	Yearly net energy	3363.64	2048.05	2223.96	908.368	3224.34	1908.75	2084.66	769.067		-1532.81	-6906.11	-5751.83	-11125.1	-1905.64	-7278.95	-6124.66	-11498
	January	-265.545	-375.177	-366.668	-476.3	-293.154	-402.787	-394.277	-503.909		-1771.31	-2219.08	-2145.66	-2593.43	-1845.2	-2292.98	-2219.55	-2667.33
	February	-73.3573	-182.99	-171.14	-280.772	-96.3649	-205.997	-194.147	-303.78		-1195.37	-1643.15	-1557.36	-2005.13	-1256.95	-1704.73	-1618.93	-2066.71
	March	285.108	175.476	188.844	79.2119	265.308	155.676	169.044	59.4114		-190.385	-638.161	-546.748	-994.524	-243.38	-691.156	-599.743	-1047.52
	April	534.284	424.652	441.208	331.576	529.822	420.19	436.746	327.114		646.803	199.027	302.243	-145.532	634.86	187.085	290.301	-157.475
	May	753.421	643.788	662.167	552.534	753.421	643.788	662.167	552.534		1289.19	841.416	951.377	503.601	1289.19	841.416	951.377	503.601
	June	784.076	674.444	695.1	585.467	784.076	674.444	695.1	585.467		1353.27	905.495	1023.89	576.111	1353.27	905.495	1023.89	576.111
	July	833.024	723.392	744.503	634.871	833.024	723.392	744.503	634.871		1447.83	1000.05	1120.13	672.355	1447.83	1000.05	1120.13	672.355
	August	696.768	587.136	608.399	498.766	696.768	587.136	608.399	498.766		1106.48	658.701	779.341	331.565	1106.48	658.701	779.341	331.565
	September	386.022	276.389	293.401	183.769	383.93	274.298	291.31	181.677		271.783	-175.992	-71.0901	-518.866	266.185	-181.59	-76.6882	-524.464
	October	32.4707	-77.1616	-65.7673	-175.4	19.9211	-89.7113	-78.3169	-187.949		-806.034	-1253.81	-1169.7	-1617.48	-839.623	-1287.4	-1203.29	-1651.07
	November	-244.79	-354.422	-345.913	-455.545	-264.033	-373.665	-365.155	-474.788		-1631.21	-2078.98	-2005.56	-2453.33	-1682.71	-2130.49	-2057.06	-2504.83
	December	-357.841	-467.474	-460.179	-569.811	-388.379	-498.011	-490.716	-600.348		-2053.85	-2501.63	-2432.7	-2880.47	-2135.58	-2583.36	-2514.43	-2962.21
	Total	3363.64	2048.05	2223.96	908.368	3224.34	1908.75	2084.66	769.067		-1532.81	-6906.11	-5751.83	-11125.1	-1905.64	-7278.95	-6124.66	-11498
electric energy needed in one year		7051.01	8366.59	8190.69	9506.28	7190.31	8505.89	8329.99	9645.58		29652.4	35025.7	33871.4	39244.7	30025.2	35398.5	34244.2	39617.5
daily		19.3178	22.9222	22.4402	26.0446	19.6995	23.3038	22.8219	26.4262		81.2393	95.9607	92.7983	107.52	82.2608	96.9822	93.8197	108.541
required battery (2xdaily need)		38.6356	45.8443	44.8805	52.0892	39.3989	46.6076	45.6438	52.8525		162.479	191.921	185.597	215.039	164.522	193.964	187.639	217.082
energy required for storage
	negative kWh	-941.534	-1457.22	-1409.67	-1957.83	-1041.93	-1570.17	-1522.61	-2070.77		-7648.16	-10510.8	-9928.81	-13208.8	-8003.45	-10871.7	-10289.7	-13581.6
	reversed	941.534	1457.22	1409.67	1957.83	1041.93	1570.17	1522.61	2070.77		7648.16	10510.8	9928.81	13208.8	8003.45	10871.7	10289.7	13581.6
	required energy for hydrogene	2460.11	3807.55	3683.28	5115.56	2722.44	4102.66	3978.4	5410.68		19983.7	27463.4	25942.7	34512.9	20912	28406.4	26885.7	35487
	75% addition	4305.19	6663.21	6445.75	8952.23	4764.26	7179.66	6962.2	9468.69		34971.5	48061	45399.8	60397.5	36596.1	49711.2	47050	62102.3
	overproduction	4305.17	3505.28	3633.62	2866.2	4266.27	3478.92	3607.27	2839.84		6115.35	3604.69	4176.98	2083.63	6097.81	3592.75	4165.04	2083.63
	difference of overproduction and enrgy for storage -> would be possible to sell it on the energy market	-0.0196242	-3157.93	-2812.12	-6086.04	-497.993	-3700.74	-3354.93	-6628.85		-28856.1	-44456.3	-41222.8	-58313.9	-30498.2	-46118.4	-42885	-60018.7
	required energy production; total (with considering hydrogen)	10414.7	13572.6	13226.8	16500.7	10912.6	14115.4	13769.6	17043.5		56975.7	72575.9	69342.4	86433.5	58617.8	74238	71004.5	88138.2
		-0.0196242	-3157.93	-2812.12	-6086.04	-497.993	-3700.74	-3354.93	-6628.85		-28856.1	-44456.3	-41222.8	-58313.9	-30498.2	-46118.4	-42885	-60018.7
	rooftop	0.573939	0.573939	1	IF(C39=0;D38;E38)
	facade	0			0.272	0.221
					0.272

[truncated: 18 more sheets: sensitivity, 1Price SNPU, 2Price SNPR, 3Price SNCU, 4Price SNCR, 5Price SRPU, 6Price SRPR, 7Price SRCU, 8Price SRCR, 1Price MNPU, 2Price MNPR, 3Price MNCU, 4Price MNCR, 5Price MRPU, 6Price MRPR, 7Price MRCU, 8Price MRCR, cost splitting]
