# Supplementary material for: Energy self-sufficient households with photovoltaics and electric vehicles are feasible in temperate climate
Source: PLoS One. 2020 Mar 4;15(3):e0227368. doi: 10.1371/journal.pone.0227368 (PMC7055740; doi:10.1371/journal.pone.0227368)
Supplement: S5 Dataset — File name S5_Methods_GridBased_withoutBatteries. (XLSX) [file pone.0227368.s005.xlsx]

## Sheet: DHW real
	adjusted to SPF of heat pump					8	11		Final Table					Conventional building
	factor	3.5				11.8	23			SFH	MFH unit			SFB	MFB
						23.8			January	51.9048	270		january	181.667	945
						15.2			February	51.9048	270		february	181.667	945
					average [kWh/(m2*year)]	14.7	17		March	51.9048	270		march	181.667	945
									April	51.9048	270		april	181.667	945
						10.878	12.58		May	51.9048	270		may	181.667	945
									June	51.9048	270		june	181.667	945
									July	51.9048	270		july	181.667	945
									August	51.9048	270		august	181.667	945
						SFB	MFB		September	51.9048	270		september	181.667	945
						10.9	12.6		October	51.9048	270		october	181.667	945
						200	900		November	51.9048	270		november	181.667	945
						2180	11340		December	51.9048	270		december	181.667	945
						181.667	945		Total	622.857	3240		sum	2180	11340

## Sheet: space heat
	16	22.5					heat pump SPF		heat pump SPF of retrofitted houses				factor:	100
	0.53	0.56					4.818		4.38438
	7.52	9.9
				1504	1980
	18.2	20.9
	0.34	0.39
	12.012	12.749
				10810.8	11474.1
	Final Table									withouth SPF (for conventional heating)
		%heating		new SFH	retro SFH	new MFH	retro MFH			new SFH	retro SFH	new MFH	retro MFH
	January	19.8	0.198	61.8082	89.4174	444.279	518.174		January	297.792	392.04	2140.54	2271.87
	February	16.5	0.165	51.5068	74.5145	370.233	431.812		February	248.16	326.7	1783.78	1893.23
	March	14.2	0.142	44.3271	64.1277	318.625	371.62		March	213.568	281.16	1535.13	1629.32
	April	3.2	0.032	9.98921	14.4513	71.8027	83.7453		April	48.128	63.36	345.946	367.171
	May	0	0	0	0	0	0		May	0	0	0	0
	June	0	0	0	0	0	0		June	0	0	0	0
	July	0	0	0	0	0	0		July	0	0	0	0
	August	0	0	0	0	0	0		August	0	0	0	0
	September	1.5	0.015	4.68244	6.77405	33.6575	39.2556		September	22.56	29.7	162.162	172.111
	October	9	0.09	28.0946	40.6443	201.945	235.534		October	135.36	178.2	972.972	1032.67
	November	13.8	0.138	43.0785	62.3212	309.649	361.152		November	207.552	273.24	1491.89	1583.43
	December	21.9	0.219	68.3636	98.9011	491.4	573.132		December	329.376	433.62	2367.57	2512.83
				311.851	451.152	2241.59	2614.42			1502.5	1978.02	10800	11462.6

## Sheet: Spatial dimension
		days		365		occupancy rate	1.6	people/car		km/(person*year) without occupancy rate
		months		12		SFH	4			pp	Urban			Rural
		kWh/100km		12		MFH	20				SFH	MFH		SFH	MFH
	urban										21.0978	18.4126		33.1123	28.2269
		km/person/day		20.1						km/year	7700.7	6720.61		12086	10302.8
		Declinition		0.0171533						km/(person*car*year) with occupancy rate
		km/person/day with declination		19.7552						pp	Urban			Rural
		SFH average km		27.5							SFH	MFH		SFH	MFH
		MFH average km		24
		difference		3.5						km/year with occupancy rate	4812.94	4200.38		7553.75	6439.26
		half of difference		1.75						km/(house unit*year)
		distribution of difference		25.75						p unit	Urban			Rural
		ratio of SFH and MFH		0.0679612							SFH	MFH		SFH	MFH
	rural									km/year with occupancy rate	19251.7	84007.6		30215	128785
		km/person/day		31.2						kWh/km	0.12
		Declinition		0.017						kWh/(house unit * year)
		km/person/day with declination		30.6696						p unit	Urban			Rural
		SFH average km		30.5							SFH	MFH		SFH	MFH
		MFH average km		26
		difference		4.5						km/year with occupancy rate	2310.21	10080.9		3625.8	15454.2
		half of difference		2.25						Final Table
		distribution of difference		28.25						kWh/(house unit * month)
		ratio of SFH and MFH		0.079646						p unit	Urban			Rural
											SFH	MFH		SFH	MFH
	People in Mio.	7.87	8.758	9.541	10.044	0.276	-0.146837			km/year with occupancy rate	192.517	840.076		302.15	1287.85
		115187	127470	137820	144510	0.255	-0.133679
	14636	14555	14445	14388		14305.3
		81	110	57	82.6667		0.0171533
					0.0114737

## Sheet: Electricity demand
		Final Table								factor:	100
			Progressive electricity demand - SFH	Progressive electricity demand - MFH	Conservative electricity demand - SFH	Conservative electricity demand - MFH					progressive		conservative			sum (for control)
		January	326.175	1207.47	427.297	1581.82					SFH	MFH	SFH	MFH		3806.09	14089.8	4945.77	18308.9
		February	315.401	1167.59	413.183	1529.57			Electricity demand.		5200	19250	5200	19250
		March	310.503	1149.46	406.768	1505.82			reduction		0.29306	0.29306	0.07389	0.07389
		April	300.219	1111.39	393.295	1455.95			reduced demand		3676.09	13608.6	4815.77	17827.6
		May	294.342	1089.63	385.596	1427.45			13.3% of red. Demand		490.709	1816.57	642.842	2379.75
		June	312.996	1158.69	401.973	1488.07			base red. Demand w/o 13.3%		3185.38	11792	4172.93	15447.9
		July	350.527	1297.62	439.048	1625.32			monthly base red. Demand w/o 13.3%		265.448	982.669	347.744	1287.32
		August	324.037	1199.56	412.407	1526.7			climate share		0.025	0.025	0.025	0.025
		September	298.75	1105.95	391.37	1448.82			climate share [kWh]		130	481.25	130	481.25
		October	316.87	1173.03	415.108	1536.7			climate share June		26	96.25	26	96.25
		November	326.175	1207.47	427.297	1581.82			climate share August		39	144.375	39	144.375
		December	330.093	1221.98	432.43	1600.82			climate share July		65	240.625	65	240.625
		Total	3806.09	14089.8	4945.77	18308.9
										January	February	March	April	May	June	July	August	September	October	November	December
									%lighting	12.4	10.2	9.2	7.1	5.9	4.4	4.1	4	6.8	10.5	12.4	13.2	100.2
									lighting in absolute values	0.124	0.102	0.092	0.071	0.059	0.044	0.041	0.04	0.068	0.105	0.124	0.132	1.002
									transposed	%lighting	lighting in absolute values	adjusted absolute values to 100.00%
									January	12.4	0.124	0.123752
									February	10.2	0.102	0.101796
									March	9.2	0.092	0.0918164
									April	7.1	0.071	0.0708583
									May	5.9	0.059	0.0588822
									June	4.4	0.044	0.0439122
									July	4.1	0.041	0.0409182
									August	4	0.04	0.0399202
									September	6.8	0.068	0.0678643
									October	10.5	0.105	0.10479
									November	12.4	0.124	0.123752
									December	13.2	0.132	0.131737
										100.2	1.002	1

## Sheet: rooftopfacade area
								Assumption:
		rooftop						SFB -> only two stories and not three -> rooftop area increases!
		MFB			SFH
		floor area	900		200
		stories	5		3
		per story	180		66.6667
		each house side	13.4164		8.16497
		rooftop angle	35		35
		tan(35)	0.700208		0.700208
		roof height (ankatete)	9.39427		5.71717
		roof hypothenuse	16.3784		9.96758
		roof area	219.739		81.385
		Facade
		L	14.5		8.5
		H	14		9
		area	203		76.5
		share of PV	0.333333		0.333333
		PV area	67.6667		25.5

## Sheet: PV efficiency
		rooftop to facade efficiency factor:					mono cr-Si	0.267
							thin film	0.21
							factor	0.786517
		Same efficiency as today				Efficiency: 0.05%/year				Efficiency: 0.10%/year				Efficiency: 0.15%/year
			mono cr-Si	thin film			mono cr-Si	thin film			mono cr-Si	thin film			mono cr-Si	thin film
		2050	0.17	0.133708		2050	0.187	0.147079		2050	0.204	0.160449		2050	0.221	0.17382
		Efficiency: 0.20%/year				Efficiency: 0.25%/year				Efficiency: 0.25%/year				Efficiency: 0.17%/year
			mono cr-Si	thin film			mono cr-Si	thin film			mono cr-Si	thin film			mono cr-Si	thin film
			0.238	0.187191			0.255	0.200562			0.272	0.213933		2050	0.2278	0.179169

## Sheet: Storage eff.
	Efficiencies
	compression effort	1
	electrolyzer	0.8
	fuel cell	0.52
	battery factor	0.92
	round trip	0.38272
	Storage tank factor
		0.736

## Sheet: Electricity prod.
										Efficiency matters
		Final Table								efficiency in 2050 rooftop	0.272
			SFH new	MFH new	SFH retrofitted	MFH retrofitted				efficiency in 2050 facade	0.213933
		January	885.443	2381.85	677.009	1819.08				performance ratio	0.9
		February	1271.81	3422.14	966.156	2596.88				battery efficiency	1
		March	2025.01	5451.28	1522.56	4094.65				Inverter efficiency	0.99
		April	2443.78	6580.5	1825.11	4910.08				kwh/m2/year rooftop	1000
		May	2875.71	7744.54	2141.55	5762.31				kwh/m2/year facade	800
		June	2981.18	8028.75	2219.01	5970.87				efficiency future rooftop	242.352
		July	3177.81	8558.11	2366.5	6367.57				efficiency future facade	152.491
		August	2836.09	7637.02	2117.24	5696.13
		September	2121.55	5711.8	1590.96	4279.21					SFH new	MFH new	SFH retro	MFH retro
		October	1437.89	3870.23	1084.58	2916.29				rooftop
		November	870.447	2342.23	660.863	1776.36				yearly prod/m2	242.352	242.352
		December	685.614	1844.39	523.668	1407.14				factor of rooftop discount	0	0	0.3	0.3
		Total	23612.3	63572.9	17695.2	47596.6				rooftop area of solar PV w/o discount	81.385	219.739	81.385	219.739
										rooftop area of solar PV w discount	81.385	219.739	56.9695	153.818	56.9695	153.818
										rooftop area of solar collectors	0	0	0	0
										rooftop area w/o solar collectors	81.385	219.739	56.9695	153.818
										yearly yield	19723.8	53254.3	13806.7	37278
										facade
										yearly prod/m2	152.491	152.491
										facade area	25.5	67.6667
										yearly yield	3888.52	10318.6
										total yield	23612.3	63572.9
										Share rooftop	Share facades
										0.0352254	0.0490325
										0.0516554	0.065055
										0.0849151	0.09005
										0.104556	0.0981183
										0.124074	0.110197
										0.128808	0.113305
										0.137112	0.121752
										0.121485	0.113136
										0.0896695	0.09076
										0.0597099	0.0669105
										0.0354199	0.0441895
										0.0273689	0.0374937
										1	1

## Sheet: sensitivity
															heat pump price		3.8	36000	1
	Discount rate		Electrolyzer		Storage tank		Fuel cell		Battery		PV price				SFB	MFB
	0.04		0.666667		600		0.333333		0.5		200				36000	136800
		abundant	scarce
	Income	0	0.155
	Expenditures	0.21	0.31		Expenditures same values as with alternative cases

## Sheet: Cases
		Case X - Production																	Case X - Demand
		SFH									MFH unit								SFH									MFH unit
		New				Retrofit					New				Retrofit				New				Retrofit					New				Retrofit
		Progressive		Conservative		Progressive		Conservative			Progressive		Conservative		Progressive		Conservative		Progressive		Conservative		Progressive		Conservative			Progressive		Conservative		Progressive		Conservative
		Urban	Rural	Urban	Rural	Urban	Rural	Urban	Rural		Urban	Rural	Urban	Rural	Urban	Rural	Urban	Rural	Urban	Rural	Urban	Rural	Urban	Rural	Urban	Rural		Urban	Rural	Urban	Rural	Urban	Rural	Urban	Rural
	solar yield	23612.3	23612.3	23612.3	23612.3	17695.2	17695.2	17695.2	17695.2		63572.9	63572.9	63572.9	63572.9	47596.6	47596.6	47596.6	47596.6
	DHW expense	622.857	622.857	622.857	622.857	622.857	622.857	622.857	622.857		3240	3240	3240	3240	3240	3240	3240	3240
	Heat expense	311.851	311.851	311.851	311.851	451.152	451.152	451.152	451.152		2241.59	2241.59	2241.59	2241.59	2614.42	2614.42	2614.42	2614.42
	Electricity demand	3806.09	3806.09	4945.77	4945.77	3806.09	3806.09	4945.77	4945.77		14089.8	14089.8	18308.9	18308.9	14089.8	14089.8	18308.9	18308.9
	Spatial expense	2310.21	3625.8	2310.21	3625.8	2310.21	3625.8	2310.21	3625.8		10080.9	15454.2	10080.9	15454.2	10080.9	15454.2	10080.9	15454.2
	Yearly net energy	16561.3	15245.7	15421.6	14106.1	10504.9	9189.3	9365.2	8049.61		33920.5	28547.2	29701.5	24328.2	17571.4	12198.1	13352.4	7979.06
	January	885.443	885.443	885.443	885.443	677.009	677.009	677.009	677.009		2381.85	2381.85	2381.85	2381.85	1819.08	1819.08	1819.08	1819.08	632.405	742.038	733.528	843.16	660.014	769.647	761.137	870.769		2761.83	3209.6	3136.18	3583.95	2835.72	3283.5	3210.07	3657.85
	February	1271.81	1271.81	1271.81	1271.81	966.156	966.156	966.156	966.156		3422.14	3422.14	3422.14	3422.14	2596.88	2596.88	2596.88	2596.88	611.33	720.962	709.112	818.745	634.337	743.97	732.12	841.752		2647.9	3095.67	3009.88	3457.66	2709.48	3157.25	3071.46	3519.24
	March	2025.01	2025.01	2025.01	2025.01	1522.56	1522.56	1522.56	1522.56		5451.28	5451.28	5451.28	5451.28	4094.65	4094.65	4094.65	4094.65	599.253	708.885	695.517	805.149	619.053	728.686	715.317	824.95		2578.16	3025.94	2934.52	3382.3	2631.16	3078.93	2987.52	3435.29
	April	2443.78	2443.78	2443.78	2443.78	1825.11	1825.11	1825.11	1825.11		6580.5	6580.5	6580.5	6580.5	4910.08	4910.08	4910.08	4910.08	554.63	664.263	647.706	757.339	559.093	668.725	652.168	761.801		2293.27	2741.04	2637.83	3085.6	2305.21	2752.98	2649.77	3097.54
	May	2875.71	2875.71	2875.71	2875.71	2141.55	2141.55	2141.55	2141.55		7744.54	7744.54	7744.54	7744.54	5762.31	5762.31	5762.31	5762.31	538.765	648.397	630.018	739.651	538.765	648.397	630.018	739.651		2199.71	2647.48	2537.52	2985.3	2199.71	2647.48	2537.52	2985.3
	June	2981.18	2981.18	2981.18	2981.18	2219.01	2219.01	2219.01	2219.01		8028.75	8028.75	8028.75	8028.75	5970.87	5970.87	5970.87	5970.87	557.419	667.051	646.395	756.027	557.419	667.051	646.395	756.027		2268.76	2716.54	2598.15	3045.92	2268.76	2716.54	2598.15	3045.92
	July	3177.81	3177.81	3177.81	3177.81	2366.5	2366.5	2366.5	2366.5		8558.11	8558.11	8558.11	8558.11	6367.57	6367.57	6367.57	6367.57	594.949	704.582	683.47	793.103	594.949	704.582	683.47	793.103		2407.7	2855.48	2735.4	3183.17	2407.7	2855.48	2735.4	3183.17
	August	2836.09	2836.09	2836.09	2836.09	2117.24	2117.24	2117.24	2117.24		7637.02	7637.02	7637.02	7637.02	5696.13	5696.13	5696.13	5696.13	568.46	678.092	656.829	766.461	568.46	678.092	656.829	766.461		2309.64	2757.41	2636.77	3084.55	2309.64	2757.41	2636.77	3084.55
	September	2121.55	2121.55	2121.55	2121.55	1590.96	1590.96	1590.96	1590.96		5711.8	5711.8	5711.8	5711.8	4279.21	4279.21	4279.21	4279.21	547.855	657.487	640.475	750.107	549.946	659.579	642.566	752.199		2249.68	2697.46	2592.56	3040.33	2255.28	2703.06	2598.15	3045.93
	October	1437.89	1437.89	1437.89	1437.89	1084.58	1084.58	1084.58	1084.58		3870.23	3870.23	3870.23	3870.23	2916.29	2916.29	2916.29	2916.29	589.387	699.019	687.625	797.257	601.936	711.569	700.174	809.807		2485.05	2932.82	2848.72	3296.49	2518.64	2966.41	2882.31	3330.08
	November	870.447	870.447	870.447	870.447	660.863	660.863	660.863	660.863		2342.23	2342.23	2342.23	2342.23	1776.36	1776.36	1776.36	1776.36	613.675	723.308	714.798	824.431	632.918	742.551	734.041	843.673		2627.2	3074.97	3001.55	3449.32	2678.7	3126.48	3053.05	3500.83
	December	685.614	685.614	685.614	685.614	523.668	523.668	523.668	523.668		1844.39	1844.39	1844.39	1844.39	1407.14	1407.14	1407.14	1407.14	642.878	752.511	745.216	854.848	673.416	783.048	775.753	885.386		2823.45	3271.23	3202.3	3650.07	2905.19	3352.96	3284.03	3731.81
	Total	23612.3	23612.3	23612.3	23612.3	17695.2	17695.2	17695.2	17695.2		63572.9	63572.9	63572.9	63572.9	47596.6	47596.6	47596.6	47596.6	7051.01	8366.59	8190.69	9506.28	7190.31	8505.89	8329.99	9645.58		29652.4	35025.7	33871.4	39244.7	30025.2	35398.5	34244.2	39617.5
electric energy needed in one year		7051.01	8366.59	8190.69	9506.28	7190.31	8505.89	8329.99	9645.58		29652.4	35025.7	33871.4	39244.7	30025.2	35398.5	34244.2	39617.5
daily		19.3178	22.9222	22.4402	26.0446	19.6995	23.3038	22.8219	26.4262		81.2393	95.9607	92.7983	107.52	82.2608	96.9822	93.8197	108.541
required battery (2xdaily need)		38.6356	45.8443	44.8805	52.0892	39.3989	46.6076	45.6438	52.8525		162.479	191.921	185.597	215.039	164.522	193.964	187.639	217.082
	required energy production; total (with considering hydrogen)	23612.3	23612.3	23612.3	23612.3	17695.2	17695.2	17695.2	17695.2		63572.9	63572.9	63572.9	63572.9	47596.6	47596.6	47596.6	47596.6

[truncated: 17 more sheets: price table, 1Price SNPU, 2Price SNPR, 3Price SNCU, 4Price SNCR, 5Price SRPU, 6Price SRPR, 7Price SRCU, 8Price SRCR, 1Price MNPU, 2Price MNPR, 3Price MNCU, 4Price MNCR, 5Price MRPU, 6Price MRPR, 7Price MRCU, 8Price MRCR]
